# Supplementary material for: Silibinin Restores NAD+ Levels and Induces the SIRT1/AMPK Pathway in Non-Alcoholic Fatty Liver
Source: MDPI journal article supplement (doi:10.3390/nu9101086), 2017-09-30
Supplement: s1 [file s1]

**Supplementary Table S1.** Primers sequences used for real time PCR analysis.

| Gene name        | Forward                     | Reverse                       |
|------------------|-----------------------------|-------------------------------|
| hGAPDH           | 5'-AGACACCATGGGGAAGGTGA-3'  | 5'-TGGAATTTGCCATGGGTGGA-3'    |
| hCPT1A           | 5'-TCCAGTTGGCTTATCGTGGTG-3' | 5'-TCCAGAGTCCGATTGATTTTGC-3'  |
| hFAS             | 5'-CGGAGGCATCAACCCAGATT-3'  | 5'-GATGGTGGTGTAGACCTTCCG-3'   |
| hPPAR $\alpha$   | 5'-AAGAGCTTGGAGCTCGGC-3'    | 5'-TGAAAGCGTGTCCTGATGA-3'     |
| hPPAR $\delta$   | 5'-AGAGTACGTGGGAGAAATGAC-3' | 5'-GATGGCCACCTCTTTGCTCT-3'    |
| hSIRT1           | 5'-TGATTGGCACAGATCCTCGAA-3' | 5'-AAGTCTACAGCAAGGCGAGC-3'    |
| m $\beta$ -actin | 5'-TGTCCACCTTCCAGCAGATGT-3' | 5'-AGCTCAGTAACAGTCCGCCTAGA-3' |
| mCPT1A           | 5'-TGAGCAACAAGCTGAAGTCC-3'  | 5'-AGGCACCTCCAGTCACACAA-3'    |
| mFAS             | 5'-TTCAGCACAGTGGATCATCA-3'  | 5'-CAAGTAATAAGCACTCCTGA-3'    |
| mPPAR $\alpha$   | 5'-GCGCAAGTGTTACGAAGTGG-3'  | 5'-GGTTGGCAGCTCTCATGTCT-3'    |
| mSIRT1           | 5'-AGAACCACCAAAGCGGAAA-3'   | 5'-TCCCACAGGAGACAGAAACC-3'    |

**Supplementary Figure S1.**

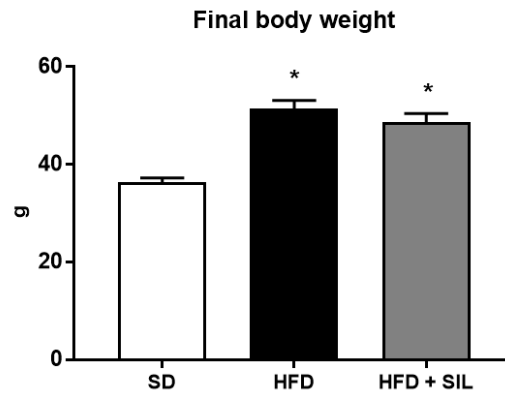

\*  $p < 0.05$  vs. SD
